# Supplementary material for: Transamidation of gluten proteins during the bread-making process of wheat flour to produce breads with less immunoreactive gluten
Source: Royal Society of Chemistry journal article supplement (doi:10.1039/c4fo00118d), 2014-05-19
Supplement: c4fo00118d1.pdf [file c4fo00118d1.pdf]

### Supplementary data

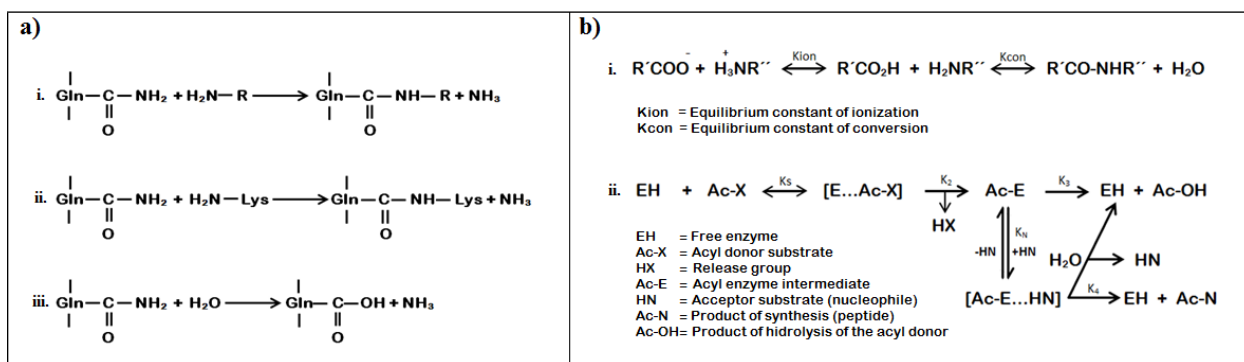

**Fig. S1.** Reactions catalyzed by transglutaminase (a) i. acyl transfer, ii. incorporation of an  $\epsilon$ -amino group of Lys and, iii. deamidation; synthesis of peptides by proteases (b) i. thermodynamically controlled and, ii. kinetically controlled synthesis.

**Table S1.** Mixograph parameters of treated doughs with microbial transglutaminase or chymotrypsin and lysine or valine.

| Treatment                             | MT<br>(s)               | PR1<br>(AU)            | PW1<br>(AU)            | PR3<br>(AU)            | PW3<br>(AU)           | RBD<br>(%)             |
|---------------------------------------|-------------------------|------------------------|------------------------|------------------------|-----------------------|------------------------|
| <i>a</i> : WF (Control)               | 197 ± 2.1 <sup>bc</sup> | 74 ± 1.4 <sup>cd</sup> | 46 ± 3.5 <sup>ab</sup> | 61 ± 0.7 <sup>cd</sup> | 24 ± 3.5 <sup>b</sup> | 18 ± 3.5 <sup>b</sup>  |
| <i>b</i> : 10% Lys/mTG                | 825 ± 42 <sup>c</sup>   | 79 ± 5.7 <sup>d</sup>  | 56 ± 1.4 <sup>b</sup>  | 79 ± 4.9 <sup>c</sup>  | 47 ± 2.1 <sup>c</sup> | 1 ± 0.9 <sup>a</sup>   |
| <i>c</i> : 2% Lys/mTG                 | 323 ± 10.6 <sup>d</sup> | 83 ± 1.4 <sup>d</sup>  | 51 ± 2.8 <sup>b</sup>  | 71 ± 2.1 <sup>de</sup> | 40 ± 1.4 <sup>c</sup> | 15 ± 4.0 <sup>ab</sup> |
| <i>d</i> : 5% Val/ChT                 | 120 ± 0 <sup>a</sup>    | 61 ± 3.5 <sup>ab</sup> | 31 ± 7.1 <sup>a</sup>  | 34 ± 1.4 <sup>a</sup>  | 8 ± 0.7 <sup>a</sup>  | 44 ± 0.9 <sup>c</sup>  |
| <i>e</i> : 10% Lys/ChT                | 240 ± 0 <sup>c</sup>    | 65 ± 1.4 <sup>bc</sup> | 36 ± 2.1 <sup>a</sup>  | 54 ± 0.7 <sup>bc</sup> | 20 ± 0 <sup>b</sup>   | 18 ± 0.7 <sup>b</sup>  |
| <i>f</i> : 10% Lys <sub>ME</sub> /ChT | 137 ± 2.1 <sup>ab</sup> | 50 ± 0.7 <sup>a</sup>  | 55 ± 3.2 <sup>b</sup>  | 46 ± 4.9 <sup>ab</sup> | 27 ± 4.6 <sup>b</sup> | 8 ± 8.7 <sup>ab</sup>  |

WF, wheat flour alone; Lys, L-Lysine; mTG, microbial transglutaminase; Val, L-valine methyl ester; LysME, L-Lysine methyl ester; ChT, chymotrypsin; MT, mixing time; PR1, peak resistance; PW1, peak width; PR3, height of the curve at three minutes after the peak; PW3, width of the curve at three minutes after the peak; RBD, resistance breakdown. Statistical comparisons were made among rows ( $p < 0.05$ ).
